# Supplementary material for: Inter-vendor and inter-observer reliability of diffusion tensor imaging in the musculoskeletal system: a multiscanner MR study
Source: PubMed Central journal article supplement (PMC9911574; doi:10.1186/s13244-023-01374-0), 2023-02-09
Supplement: 13244_2023_1374_MOESM1_ESM.pdf [file 13244_2023_1374_MOESM1_ESM.pdf]

## **ELECTRONIC SUPPLEMENTARY MATERIAL**

**Inter-Vendor and Inter-Observer Reliability of Diffusion Tensor Imaging in the musculoskeletal system: a Multiscanner MR Study**

**Table S1**

|                                 | Observer 1 |       |         |       |         |       | p-value | Observer 2 |       |         |       |         |       | p-value |
|---------------------------------|------------|-------|---------|-------|---------|-------|---------|------------|-------|---------|-------|---------|-------|---------|
|                                 | GE         |       | Philips |       | Siemens |       |         | GE         |       | Philips |       | Siemens |       |         |
|                                 | Median     | IQR   | Median  | IQR   | Median  | IQR   |         | Median     | IQR   | Median  | IQR   | Median  | IQR   |         |
| <b>Mean Diffusivity</b>         |            |       |         |       |         |       |         |            |       |         |       |         |       |         |
| Long head of triceps brachii    | 1.529      | 0.288 | 1.370   | 0.314 | 1.424   | 0.293 | 0.0001  | 1.524      | 0.282 | 1.375   | 0.262 | 1.425   | 0.242 | 0.0202  |
| Median head of triceps brachii  | 1.482      | 0.263 | 1.452   | 0.165 | 1.460   | 0.099 | 0.3532  | 1.447      | 0.250 | 1.414   | 0.252 | 1.452   | 0.167 | 0.7933  |
| Lateral head of triceps brachii | 1.525      | 0.288 | 1.394   | 0.287 | 1.460   | 0.301 | 0.3840  | 1.526      | 0.315 | 1.415   | 0.297 | 1.464   | 0.319 | 0.2109  |
| Biceps brachii                  | 1.519      | 0.210 | 1.371   | 0.216 | 1.462   | 0.675 | 0.0381  | 1.50       | 0.213 | 1.373   | 0.199 | 1.527   | 0.432 | 0.3840  |
| Coraco brachialis               | 1.496      | 0.222 | 1.423   | 0.194 | 1.421   | 0.286 | 0.3532  | 1.50       | 0.213 | 1.427   | 0.180 | 1.374   | 0.408 | 0.4917  |
| <b>RA</b>                       |            |       |         |       |         |       |         |            |       |         |       |         |       |         |

|                                 |       |       |       |       |       |       |        |       |       |       |       |       |       |        |
|---------------------------------|-------|-------|-------|-------|-------|-------|--------|-------|-------|-------|-------|-------|-------|--------|
| Long head of triceps brachil    | 0.010 | 0.002 | 0.010 | 0.002 | 0.010 | 0.002 | 0.9364 | 0.010 | 0.002 | 0.009 | 0.002 | 0.010 | 0.002 | 0.9161 |
| Median head of triceps brachil  | 0.010 | 0.001 | 0.010 | 0.002 | 0.009 | 0.001 | 0.1187 | 0.009 | 0.001 | 0.010 | 0.002 | 0.009 | 0.001 | 0.3197 |
| Lateral head of triceps brachil | 0.010 | 0.002 | 0.010 | 0.001 | 0.010 | 0.002 | 0.7393 | 0.010 | 0.001 | 0.010 | 0.001 | 0.009 | 0.001 | 0.3512 |
| Biceps brachil                  | 0.011 | 0.002 | 0.011 | 0.002 | 0.011 | 0.002 | 0.8435 | 0.011 | 0.002 | 0.011 | 0.001 | 0.011 | 0.003 | 0.9300 |
| Coraco brachialis               | 0.012 | 0.004 | 0.012 | 0.002 | 0.012 | 0.003 | 0.4884 | 0.012 | 0.003 | 0.012 | 0.001 | 0.012 | 0.003 | 0.7502 |
| <b>FA</b>                       |       |       |       |       |       |       |        |       |       |       |       |       |       |        |
| Long head of triceps brachil    | 0.312 | 0.049 | 0.323 | 0.045 | 0.323 | 0.032 | 0.0775 | 0.313 | 0.038 | 0.298 | 0.060 | 0.323 | 0.035 | 0.3532 |
| Median head of triceps brachil  | 0.299 | 0.030 | 0.309 | 0.037 | 0.302 | 0.022 | 0.7335 | 0.296 | 0.043 | 0.305 | 0.025 | 0.301 | 0.040 | 0.2737 |
| Lateral head of                 | 0.307 | 0.052 | 0.319 | 0.035 | 0.321 | 0.050 | 0.3840 | 0.296 | 0.035 | 0.322 | 0.040 | 0.322 | 0.036 | 0.0001 |

|                                          |       |       |       |       |       |       |        |       |       |       |       |       |       |             |
|------------------------------------------|-------|-------|-------|-------|-------|-------|--------|-------|-------|-------|-------|-------|-------|-------------|
| triceps<br>brachil                       |       |       |       |       |       |       |        |       |       |       |       |       |       |             |
| Biceps<br>brachil                        | 0.340 | 0.037 | 0.356 | 0.036 | 0.375 | 0.051 | 0.0007 | 0.342 | 0.039 | 0.356 | 0.034 | 0.369 | 0.034 | <<br>0.0001 |
| Coraco<br>brachialis                     | 0.353 | 0.070 | 0.386 | 0.055 | 0.377 | 0.055 | 0.0927 | 0.345 | 0.067 | 0.368 | 0.055 | 0.393 | 0.048 | 0.0039      |
| <b>RD</b>                                |       |       |       |       |       |       |        |       |       |       |       |       |       |             |
| Long head<br>of triceps<br>brachil       | 1.280 | 0.293 | 1.278 | 0.278 | 1.117 | 0.250 | 0.0039 | 1.132 | 0.220 | 1.228 | 0.299 | 1.218 | 0.243 | 0.0695      |
| Median<br>head of<br>triceps<br>brachil  | 1.236 | 0.243 | 1.203 | 0.198 | 1.232 | 0.132 | 0.3840 | 1.199 | 0.188 | 1.245 | 0.106 | 1.233 | 0.136 | 0.7933      |
| Lateral<br>head of<br>triceps<br>brachil | 1.285 | 0.288 | 1.299 | 0.330 | 1.195 | 0.236 | 0.3840 | 1.166 | 0.203 | 1.234 | 0.262 | 1.262 | 0.294 | 0.2109      |
| Biceps<br>brachil                        | 1.229 | 0.181 | 1.219 | 0.196 | 1.140 | 0.163 | 0.2109 | 1.155 | 0.149 | 1.219 | 0.795 | 1.269 | 0.724 | 0.2109      |
| Coraco<br>brachialis                     | 1.218 | 0.179 | 1.236 | 0.159 | 1.138 | 0.167 | 0.1228 | 1.181 | 0.183 | 1.178 | 0.237 | 1.133 | 0.379 | 0.2839      |

**Table S2**

|                         | Observer 1 |       |         |       |         |       |         | Observer 2 |       |         |       |         |       |         |
|-------------------------|------------|-------|---------|-------|---------|-------|---------|------------|-------|---------|-------|---------|-------|---------|
|                         | GE         |       | Philips |       | Siemens |       | p-value | GE         |       | Philips |       | Siemens |       | p-value |
|                         | Median     | IQR   | Median  | IQR   | Median  | IQR   |         | Median     | IQR   | Median  | IQR   | Median  | IQR   |         |
| <b>Mean Diffusivity</b> |            |       |         |       |         |       |         |            |       |         |       |         |       |         |
| Medial gastrocnemius    | 1.560      | 0.170 | 1.536   | 0.241 | 1.533   | 0.248 | 0.2737  | 1.558      | 0.134 | 1.536   | 0.138 | 1.573   | 0.229 | 0.2839  |
| Lateral gastrocnemius   | 1.546      | 0.125 | 1.535   | 0.280 | 1.687   | 0.249 | 0.3532  | 1.522      | 0.143 | 1.552   | 0.280 | 1.678   | 0.249 | 0.0310  |
| Soleus                  | 1.693      | 0.380 | 1.495   | 0.227 | 1.790   | 0.376 | 0.0202  | 1.786      | 0.416 | 1.455   | 0.209 | 1.768   | 0.337 | 0.0381  |
| Anterior tibialis       | 1.633      | 0.344 | 1.608   | 0.133 | 1.662   | 0.322 | 0.0927  | 1.565      | 0.319 | 1.640   | 0.140 | 1.641   | 0.253 | 0.3532  |
| Peroneal muscle         | 1.651      | 0.104 | 1.540   | 0.174 | 1.663   | 0.397 | 0.0381  | 1.653      | 0.109 | 1.551   | 0.175 | 1.670   | 0.340 | 0.0103  |
| Posterior tibialis      | 1.489      | 0.242 | 1.553   | 0.380 | 1.577   | 0.147 | 0.2109  | 1.471      | 0.336 | 1.573   | 0.357 | 1.607   | 0.214 | 0.4917  |
| Flexor digitorum longus | 1.448      | 0.324 | 1.739   | 0.400 | 1.413   | 0.365 | 0.1228  | 1.475      | 0.323 | 1.671   | 0.454 | 1.374   | 0.292 | 0.2488  |
| Flexor hallucis longus  | 1.580      | 0.378 | 1.753   | 0.347 | 1.785   | 0.716 | 0.3532  | 1.581      | 0.458 | 1.819   | 0.279 | 1.758   | 0.417 | 0.0695  |
| <b>FA</b>               |            |       |         |       |         |       |         |            |       |         |       |         |       |         |
| Medial gastrocnemius    | 0.299      | 0.060 | 0.288   | 0.034 | 0.281   | 0.051 | 0.1444  | 0.302      | 0.044 | 0.288   | 0.044 | 0.282   | 0.054 | 0.3840  |

|                         |       |       |       |       |       |       |        |       |       |       |       |       |       |        |
|-------------------------|-------|-------|-------|-------|-------|-------|--------|-------|-------|-------|-------|-------|-------|--------|
| Lateral gastrocnemius   | 0.295 | 0.035 | 0.272 | 0.057 | 0.298 | 0.058 | 0.0192 | 0.306 | 0.030 | 0.274 | 0.051 | 0.296 | 0.043 | 0.0010 |
| Soleus                  | 0.283 | 0.049 | 0.279 | 0.064 | 0.265 | 0.020 | 0.1444 | 0.280 | 0.039 | 0.266 | 0.058 | 0.272 | 0.042 | 0.4917 |
| Anterior tibialis       | 0.294 | 0.062 | 0.277 | 0.074 | 0.301 | 0.071 | 0.8716 | 0.277 | 0.069 | 0.274 | 0.064 | 0.293 | 0.047 | 0.0927 |
| Peroneal muscle         | 0.351 | 0.081 | 0.307 | 0.079 | 0.321 | 0.060 | 0.0010 | 0.322 | 0.075 | 0.308 | 0.077 | 0.313 | 0.069 | 0.0039 |
| Posterior tibialis      | 0.331 | 0.030 | 0.334 | 0.018 | 0.337 | 0.038 | 0.9803 | 0.336 | 0.034 | 0.328 | 0.021 | 0.325 | 0.025 | 0.6860 |
| Flexor digitorum longus | 0.324 | 0.072 | 0.331 | 0.093 | 0.317 | 0.076 | 0.1228 | 0.338 | 0.072 | 0.325 | 0.083 | 0.329 | 0.077 | 0.0310 |
| Flexor hallucis longus  | 0.315 | 0.030 | 0.299 | 0.043 | 0.319 | 0.048 | 0.7737 | 0.314 | 0.026 | 0.301 | 0.033 | 0.307 | 0.037 | 0.2717 |
| RD                      |       |       |       |       |       |       |        |       |       |       |       |       |       |        |
| Medial gastrocnemius    | 1.328 | 0.154 | 1.308 | 0.184 | 1.314 | 0.236 | 0.5780 | 1.313 | 0.209 | 1.266 | 0.259 | 1.302 | 0.239 | 0.2737 |
| Lateral gastrocnemius   | 1.291 | 0.123 | 1.281 | 0.102 | 1.335 | 0.264 | 0.2737 | 1.345 | 0.287 | 1.446 | 0.206 | 1.409 | 0.179 | 0.0422 |
| Soleus                  | 1.486 | 0.327 | 1.542 | 0.377 | 1.249 | 0.268 | 0.0072 | 1.246 | 0.182 | 1.574 | 0.325 | 1.542 | 0.253 | 0.0116 |
| Anterior tibialis       | 1.406 | 0.285 | 1.358 | 0.295 | 1.373 | 0.136 | 0.1766 | 1.375 | 0.118 | 1.421 | 0.300 | 1.421 | 0.243 | 0.1766 |
| Peroneal muscle         | 1.347 | 0.140 | 1.365 | 0.111 | 1.303 | 0.160 | 0.3840 | 1.300 | 0.155 | 1.366 | 0.295 | 1.414 | 0.255 | 0.0927 |
| Posterior tibialis      | 1.219 | 0.248 | 1.218 | 0.365 | 1.324 | 0.308 | 0.3098 | 1.348 | 0.325 | 1.342 | 0.180 | 1.337 | 0.236 | 0.2737 |
| Flexor digitorum longus | 1.230 | 0.257 | 1.238 | 0.274 | 1.447 | 0.257 | 0.2109 | 1.419 | 0.348 | 1.149 | 0.384 | 1.123 | 0.318 | 0.2109 |

|                        |       |       |       |       |       |       |        |       |       |       |       |       |       |        |
|------------------------|-------|-------|-------|-------|-------|-------|--------|-------|-------|-------|-------|-------|-------|--------|
| Flexor hallucis longus | 1.338 | 0.376 | 1.346 | 0.440 | 1.480 | 0.245 | 0.3532 | 1.547 | 0.202 | 1.489 | 0.518 | 1.495 | 0.319 | 0.0695 |
|------------------------|-------|-------|-------|-------|-------|-------|--------|-------|-------|-------|-------|-------|-------|--------|

**Table S3**

|                         | Observer 1 |           |         |           |         |           |            | Observer 2 |           |         |           |         |           |            |
|-------------------------|------------|-----------|---------|-----------|---------|-----------|------------|------------|-----------|---------|-----------|---------|-----------|------------|
|                         | GE         |           | Philips |           | Siemens |           | p-value    | GE         |           | Philips |           | Siemens |           | p-value    |
|                         | Media n    | IQR       | Media n | IQR       | Media n | IQR       |            | Media n    | IQR       | Media n | IQR       | Media n | IQR       |            |
| <b>Mean Diffusivity</b> |            |           |         |           |         |           |            |            |           |         |           |         |           |            |
| Rectus femoris          | 1.601      | 0.22<br>2 | 1.546   | 0.24<br>5 | 1.164   | 0.63<br>8 | 0.051<br>9 | 1.599      | 0.23<br>4 | 1.519   | 0.27<br>0 | 1.142   | 0.75<br>8 | 0.007<br>2 |
| Medialis vastus         | 1.618      | 0.31<br>5 | 1.629   | 0.33<br>1 | 1.433   | 0.33<br>6 | 0.020<br>2 | 1.655      | 0.31<br>1 | 1.670   | 0.28<br>2 | 1.401   | 0.30<br>1 | 0.001<br>6 |
| Lateralalis vastus      | 1.723      | 0.37<br>8 | 1.644   | 0.13<br>8 | 1.557   | 0.46<br>2 | 0.794<br>3 | 1.712      | 0.40<br>3 | 1.667   | 0.19<br>7 | 1.574   | 0.43<br>5 | 0.578<br>0 |
| Intermedius vastus      | 1.672      | 0.25<br>5 | 1.642   | 0.14<br>3 | 1.733   | 0.25<br>8 | 0.418<br>0 | 1.644      | 0.24<br>5 | 1.645   | 0.11<br>4 | 1.750   | 0.36<br>2 | 0.773<br>7 |
| Sartorius               | 1.452      | 0.35<br>2 | 1.447   | 0.30<br>7 | 1.427   | 0.30<br>1 | 0.733<br>5 | 1.400      | 0.32<br>2 | 1.448   | 0.26<br>7 | 1.430   | 0.27<br>3 | 0.926<br>2 |
| Gracilis                | 1.324      | 0.25<br>7 | 1.501   | 0.27<br>3 | 1.454   | 0.20<br>7 | 0.353<br>2 | 1.330      | 0.28<br>6 | 1.514   | 0.28<br>0 | 1.350   | 0.29<br>7 | 0.210<br>9 |
| Biceps femori           | 1.496      | 0.21<br>4 | 1.592   | 0.10<br>4 | 1.749   | 0.36<br>4 | 0.042<br>2 | 1.505      | 0.21<br>1 | 1.603   | 0.10<br>1 | 1.760   | 0.37<br>0 | 0.003<br>9 |



|                    |       |       |       |       |       |       |        |       |       |       |       |       |       |        |
|--------------------|-------|-------|-------|-------|-------|-------|--------|-------|-------|-------|-------|-------|-------|--------|
| Semitendinosus     | 1.558 | 0.205 | 1.545 | 0.202 | 1.747 | 0.130 | 0.0018 | 1.581 | 0.217 | 1.564 | 0.204 | 1.801 | 0.167 | 0.0103 |
| Semimembranosus    | 1.688 | 0.205 | 1.542 | 0.245 | 1.686 | 0.244 | 0.4917 | 1.642 | 0.198 | 1.520 | 0.280 | 1.726 | 0.179 | 0.0103 |
| <b>FA</b>          |       |       |       |       |       |       |        |       |       |       |       |       |       |        |
| Rectus femoris     | 0.264 | 0.089 | 0.305 | 0.097 | 0.281 | 0.104 | 0.4180 | 0.258 | 0.086 | 0.304 | 0.087 | 0.282 | 0.108 | 0.3532 |
| Medialis vastus    | 0.251 | 0.041 | 0.271 | 0.048 | 0.271 | 0.064 | 0.0361 | 0.253 | 0.043 | 0.274 | 0.053 | 0.271 | 0.072 | 0.4917 |
| Lateralalis vastus | 0.283 | 0.045 | 0.286 | 0.047 | 0.280 | 0.041 | 0.4662 | 0.289 | 0.060 | 0.283 | 0.037 | 0.283 | 0.054 | 0.5780 |
| Intermedius vastus | 0.235 | 0.025 | 0.233 | 0.048 | 0.232 | 0.040 | 0.6803 | 0.229 | 0.038 | 0.241 | 0.037 | 0.236 | 0.040 | 0.1817 |
| Sartorius          | 0.320 | 0.105 | 0.347 | 0.097 | 0.331 | 0.120 | 0.7737 | 0.325 | 0.087 | 0.348 | 0.105 | 0.347 | 0.112 | 1.0000 |
| Gracilis           | 0.325 | 0.059 | 0.348 | 0.068 | 0.315 | 0.064 | 0.7933 | 0.335 | 0.070 | 0.338 | 0.083 | 0.350 | 0.087 | 0.5780 |
| Biceps femori      | 0.271 | 0.025 | 0.272 | 0.032 | 0.259 | 0.026 | 0.2737 | 0.266 | 0.039 | 0.271 | 0.052 | 0.258 | 0.033 | 0.3532 |
| Semitendinosus     | 0.303 | 0.038 | 0.284 | 0.031 | 0.279 | 0.028 | 0.1557 | 0.300 | 0.038 | 0.290 | 0.035 | 0.282 | 0.039 | 0.1766 |
| Semimembranosus    | 0.263 | 0.026 | 0.256 | 0.036 | 0.262 | 0.047 | 0.3532 | 0.267 | 0.037 | 0.260 | 0.041 | 0.251 | 0.038 | 0.2488 |

| RD                 |       |           |       |           |       |           |            |       |           |       |           |       |           |            |
|--------------------|-------|-----------|-------|-----------|-------|-----------|------------|-------|-----------|-------|-----------|-------|-----------|------------|
| Rectus femoris     | 1.394 | 0.16<br>7 | 1.378 | 0.24<br>0 | 1.293 | 0.26<br>0 | 0.057<br>5 | 1.282 | 0.27<br>7 | 1.017 | 0.66<br>5 | 0.997 | 0.76<br>0 | 0.031<br>0 |
| Medialis vastus    | 1.405 | 0.30<br>4 | 1.452 | 0.30<br>0 | 1.434 | 0.35<br>6 | 0.020<br>2 | 1.461 | 0.31<br>2 | 1.245 | 0.28<br>5 | 1.216 | 0.25<br>3 | 0.001<br>6 |
| Lateralalis vastus | 1.489 | 0.31<br>6 | 1.487 | 0.29<br>8 | 1.389 | 0.16<br>9 | 0.176<br>6 | 1.416 | 0.22<br>7 | 1.328 | 0.37<br>9 | 1.326 | 0.37<br>9 | 0.353<br>2 |
| Intermedius vastus | 1.459 | 0.21<br>9 | 1.444 | 0.21<br>4 | 1.446 | 0.12<br>8 | 0.871<br>6 | 1.445 | 0.09<br>1 | 1.523 | 0.31<br>7 | 1.556 | 0.36<br>1 | 0.536<br>9 |
| Sartorius          | 1.195 | 0.22<br>1 | 1.183 | 0.24<br>7 | 1.206 | 0.28<br>2 | 0.733<br>5 | 1.232 | 0.31<br>4 | 1.141 | 0.27<br>9 | 1.136 | 0.23<br>3 | 0.926<br>2 |
| Gracilis           | 1.138 | 0.25<br>6 | 1.062 | 0.23<br>9 | 1.213 | 0.21<br>9 | 0.793<br>3 | 1.207 | 0.23<br>6 | 1.214 | 0.18<br>7 | 1.134 | 0.24<br>9 | 0.491<br>7 |
| Biceps femori      | 1.280 | 0.20<br>8 | 1.303 | 0.21<br>2 | 1.356 | 0.09<br>1 | 0.027<br>6 | 1.392 | 0.10<br>7 | 1.487 | 0.27<br>4 | 1.504 | 0.31<br>2 | 0.001<br>6 |
| Semitendinosus     | 1.312 | 0.19<br>2 | 1.341 | 0.22<br>5 | 1.314 | 0.17<br>7 | 0.001<br>2 | 1.324 | 0.18<br>4 | 1.465 | 0.15<br>0 | 1.495 | 0.10<br>2 | 0.038<br>1 |
| Semimembranosus    | 1.469 | 0.13<br>0 | 1.419 | 0.15<br>4 | 1.373 | 0.23<br>6 | 0.578<br>0 | 1.335 | 0.26<br>7 | 1.485 | 0.17<br>8 | 1.523 | 0.13<br>5 | 0.023<br>5 |
